# Supplementary material for: Achieving a “Grand Convergence” in Global Health: Modeling the Technical Inputs, Costs, and Impacts from 2016 to 2030
Source: PLoS One. 2015 Oct 9;10(10):e0140092. doi: 10.1371/journal.pone.0140092 (PMC4599920; doi:10.1371/journal.pone.0140092)
Supplement: S1 Table — (DOCX) [file pone.0140092.s001.docx]

**S1 Table**

List of interventions included in the RMNCH analysis

| **Category** | **Package** |
| --- | --- |
| **RMNCH** | **Package 1: Family Planning** |
|  | Modern family planning methods (pill, condom, injectable, IUD, implant, female sterilization, male sterilization, lactational amenorrhea method, vaginal barrier method, vaginal tablets, other contraceptives) |
| **Package 2: Maternal and Newborn Health** |
| Safe abortion |
| Post-abortion case management |
| Ectopic case management |
| Syphilis detection and treatment (pregnant women) |
| Multiple micronutrient supplementation |
| Balanced energy supplementation |
| Management of pre-eclampsia (magnesium sulphate) |
| Detection and management of diabetes in pregnancy |
| Detection and management of fetal growth restriction |
| Labour and delivery management |
| Active management of the 3rd stage of labor |
| Management of eclampsia (magnesium sulphate) |
| Neonatal resuscitation (institutional) |
| Kangaroo mother care |
| Clean practices and immediate essential newborn care (home) |
| Antenatal corticosteroids for preterm labor |
| Antibiotics for preterm premature rupture of the membranes (pPRoM) |
| Induction of labour (beyond 41 weeks) |
| Neonatal infections/newborn sepsis - Full supportive care |
| Preventive postnatal care |
| Periconceptional folic acid supplementation |
| Calcium supplementation for prevention and treatment of pre-eclampsia and eclampsia |
| **Package 3: Malaria** |
| Malaria treatment (children) |
| Insecticide treated materials |
| Pregnant women sleeping under an ITN |
| Intermittent preventive treatment - IPT (pregnant women) |
| Treatment of malaria (pregnant women) |
| **Package 4: HIV** |
| Prevention of mother to child transmission (PMTCT) |
| ART (first-line treatment) for pregnant women |
| Cotrimoxazole for children |
| Pediatric ART |
| **Package 5: Immunization** |
| Tetanus toxoid (pregnant women) |
| Rotavirus vaccine |
| Measles vaccine |
| DPT vaccination |
| Hib vaccine |
| Polio vaccine |
| BCG vaccine |
| Pneumococcal vaccine |
| Meningitis vaccine |
| **Package 6 : Child Health** |
| Oral rehydration therapy |
| Zinc (diarrhea treatment) |
| Antibiotics for treatment of dysentery |
| Pneumonia treatment (children) |
| Vitamin A for measles treatment (children) |
| Breastfeeding counseling and support |
| Complementary feeding counseling and support |
| Management of severe malnutrition (children) |
| Management of moderate acute malnutrition |
| Vitamin A supplementation in infants and children 6-59 months |

*RMNCH: Reproductive, Maternal, Neonatal, and Child Health*

* In countries where abortion is legal.

** Current analysis includes impact only, not cost.
